# Supplementary material for: Identification of Ferroptosis-Associated Long Noncoding RNA Prognostic Model and Tumor Immune Microenvironment in Thyroid Cancer
Source: Hindawi journal article supplement (doi:10.1155/2022/5893998), 2022-07-20
Supplement: f4 [file 5893998.f4.pdf]

**Table S2. The coefficients of LASSO regression model in this study.**

| <b>Long noncoding RNA</b> | <b>Coefficients</b>  |
|---------------------------|----------------------|
| AC079848.1                | 0.763010059541075    |
| SMIM25                    | 0.129275968931435    |
| AL033397.2                | 0.330822322642666    |
| AC108449.2                | 0.000622167544167072 |
| AC034213.1                | 0.107171556233424    |
| LINC02861                 | 0.0766489800054426   |
