# Supplementary material for: Identification of Ferroptosis-Associated Long Noncoding RNA Prognostic Model and Tumor Immune Microenvironment in Thyroid Cancer
Source: Hindawi journal article supplement (doi:10.1155/2022/5893998), 2022-07-20
Supplement: f5 [file 5893998.f5.pdf]

**Table S3. Baseline of training and testing sets.**

|                    | <b>overall</b><br><i>N=502</i> | <b>train</b><br><i>N=354</i> | <b>test</b><br><i>N=148</i> | <b>p.overall</b> |
|--------------------|--------------------------------|------------------------------|-----------------------------|------------------|
| futime (mean (SD)) | 3.3 (2.7)                      | 3.2 (2.6)                    | 3.7 (3.0)                   | 0.061            |
| fustat (%):        |                                |                              |                             | 0.577            |
| 0                  | 486 (96.8)                     | 344 (97.2)                   | 142 (95.9)                  |                  |
| 1                  | 16 (3.2)                       | 10 (2.8)                     | 6 (4.1)                     |                  |
| Age (mean (SD))    | 47.3 (15.8)                    | 46.9 (15.7)                  | 48.5 (16.2)                 | 0.299            |
| Gender (%):        |                                |                              |                             | 0.826            |
| Female             | 367 (73.1)                     | 260 (73.4)                   | 107 (72.3)                  |                  |
| Male               | 135 (26.9)                     | 94 (26.6)                    | 41 (27.7)                   |                  |
| Stage (%):         |                                |                              |                             | 0.622            |
| Stage I            | 281 (56.0)                     | 194 (54.8)                   | 87 (58.8)                   |                  |
| Stage II           | 52 (10.4)                      | 35 (9.9)                     | 17 (11.5)                   |                  |
| Stage III          | 112 (22.3)                     | 84 (23.7)                    | 28 (18.9)                   |                  |
| Stage IV           | 55 (11.0)                      | 40 (11.3)                    | 15 (10.1)                   |                  |
| unknow             | 2 (0.4)                        | 1 (0.3)                      | 1 (0.7)                     |                  |
| T (%):             |                                |                              |                             | 0.858            |
| T1                 | 143 (28.5)                     | 98 (27.7)                    | 45 (30.4)                   |                  |
| T2                 | 164 (32.7)                     | 119 (33.6)                   | 45 (30.4)                   |                  |
| T3                 | 170 (33.9)                     | 120 (33.9)                   | 50 (33.8)                   |                  |
| T4                 | 23 (4.6)                       | 16 (4.5)                     | 7 (4.7)                     |                  |
| unknow             | 2 (0.4)                        | 1 (0.3)                      | 1 (0.7)                     |                  |
| M (%):             |                                |                              |                             | 0.771            |
| M0                 | 282 (56.2)                     | 194 (54.8)                   | 88 (59.5)                   |                  |
| M1                 | 9 (1.8)                        | 7 (2.0)                      | 2 (1.4)                     |                  |
| MX                 | 210 (41.8)                     | 152 (42.9)                   | 58 (39.2)                   |                  |
| unknow             | 1 (0.2)                        | 1 (0.3)                      | 0 (0.0)                     |                  |
| N (%):             |                                |                              |                             | 0.969            |
| N0                 | 229 (45.6)                     | 162 (45.8)                   | 67 (45.3)                   |                  |
| N1                 | 223 (44.4)                     | 156 (44.1)                   | 67 (45.3)                   |                  |
| NX                 | 50 (10.0)                      | 36 (10.2)                    | 14 (9.5)                    |                  |
