# Supplementary material for: Identification of Ferroptosis-Associated Long Noncoding RNA Prognostic Model and Tumor Immune Microenvironment in Thyroid Cancer
Source: Hindawi journal article supplement (doi:10.1155/2022/5893998), 2022-07-20

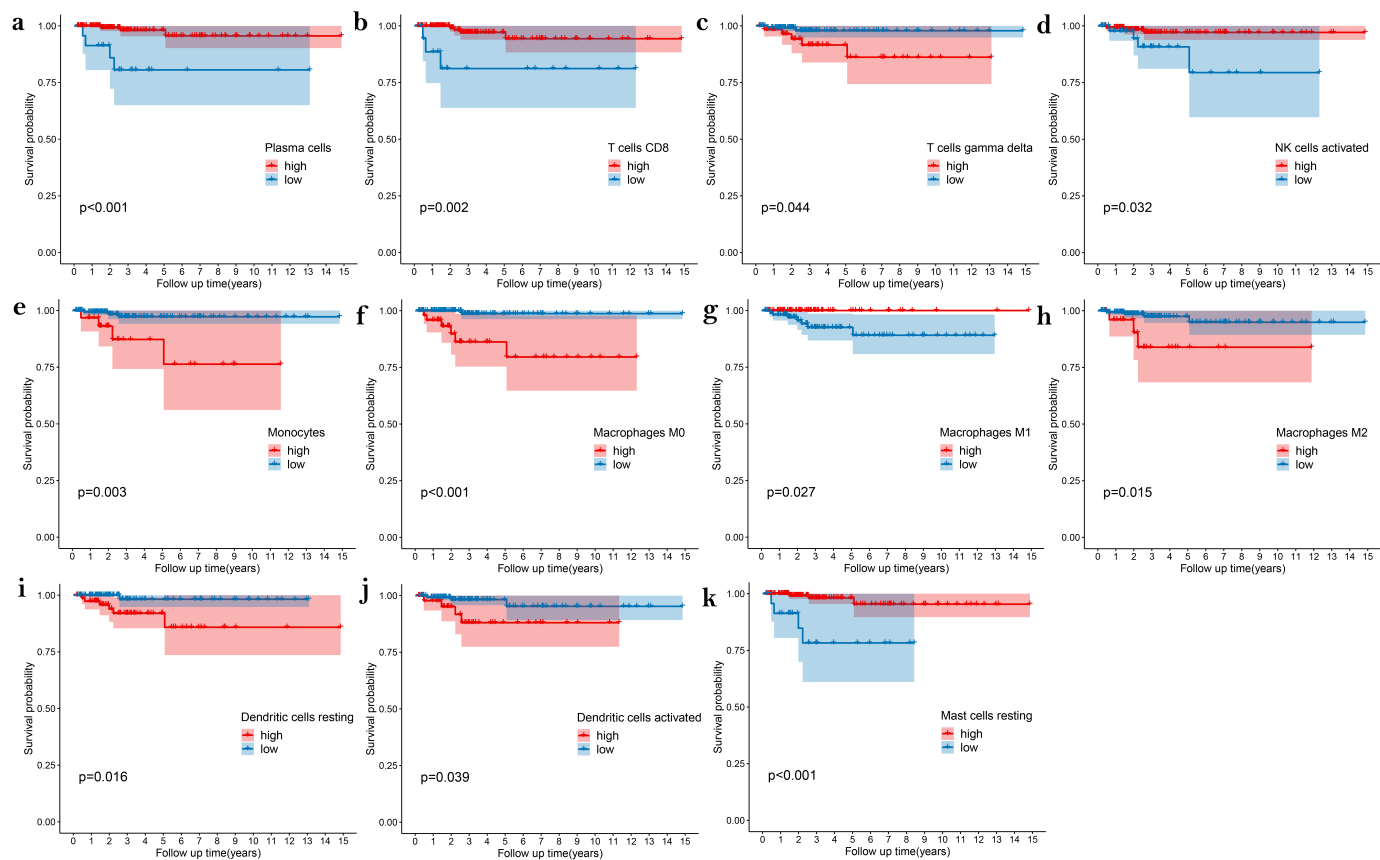

Supplement: f9 [file 5893998.f9.pdf]
